# Supplementary material for: Glutamine Anabolism Plays a Critical Role in Pancreatic Cancer by Coupling Carbon and Nitrogen Metabolism
Source: PubMed Central journal article supplement — Cell Rep. Author manuscript; Available in PMC 2019 Dec 2. (PMC6886125; doi:10.1016/j.celrep.2019.09.056), 2019-10-29
Supplement: NIHMS1542675-supplement-1.pdf [file NIHMS1542675-supplement-1.pdf]

**Supplemental Information**

**Glutamine Anabolism Plays a Critical Role  
in Pancreatic Cancer by Coupling Carbon  
and Nitrogen Metabolism**

Alex J. Bott, Jianliang Shen, Claudia Tonelli, Le Zhan, Nithya Sivaram, Ya-Ping Jiang, Xufen Yu, Vrushank Bhatt, Eric Chiles, Hua Zhong, Sara Maimouni, Weiwei Dai, Stephani Velasquez, Ji-An Pan, Nathiya Muthalagu, Jennifer Morton, Tracy G. Anthony, Hui Feng, Wouter H. Lamers, Daniel J. Murphy, Jessie Yanxiang Guo, Jian Jin, Howard C. Crawford, Lanjing Zhang, Eileen White, Richard Z. Lin, Xiaoyang Su, David A. Tuveson, and Wei-Xing Zong

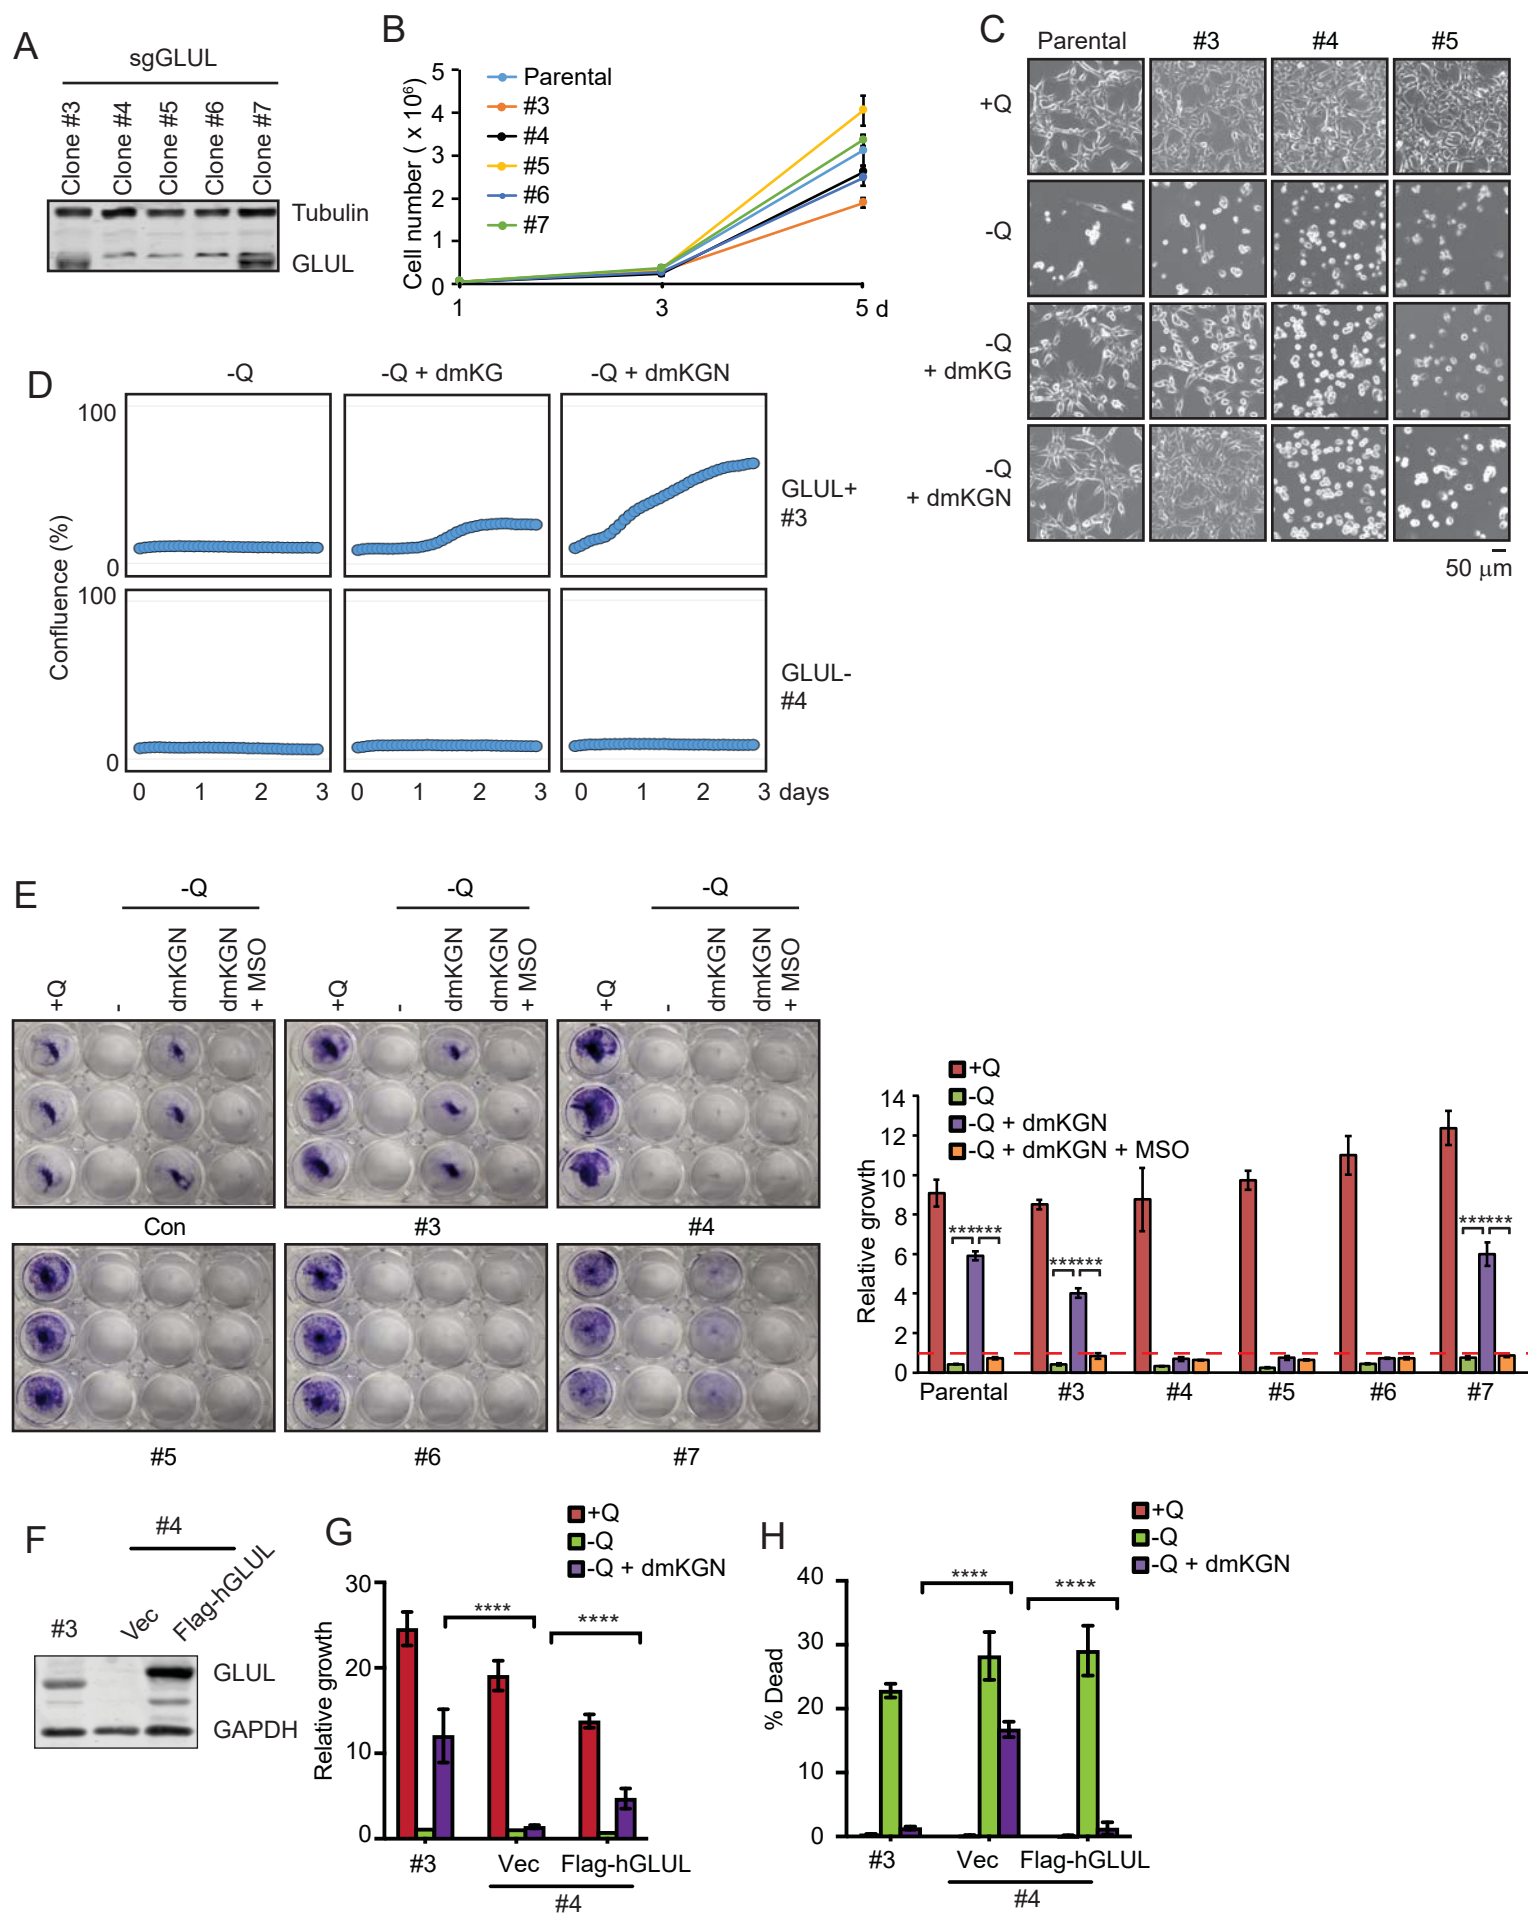

**Figure S1. GLUL is essential for aKG to rescue KC cells under glutamine limitation,  
Related to Figure 2.**

**(A)** Tumor cells isolated from the LSL-Kras<sup>G12D/+</sup>; Pdx1-Cre (KC) mice were stably transfected with a plasmid containing Cas9 and three independent sgRNAs targeting GLUL. Single cell clones were isolated via limited dilution and screened for GLUL expression. We chose to use clone #3 as GLUL-proficient and #4 as GLUL-deficient cells for the following studies. **(B)** Cells were seeded at equal density and cultured in complete medium. Cell growth was determined by hemocytometer counting. Shown are the mean of a representative triplicate experiment plus S.D. **(C and D)**. Cells were cultured under indicated conditions for 72 h. Images were captured **(C)**, and cell growth was determined via Satorious IncuCyte **(D)**. **(E)** Cells were cultured under indicated conditions for 72 h. Relative cell growth was determined by crystal violet staining and normalized to the O.D. of the initially seeded cells (red dashed line). Shown are the mean of a representative triplicate experiment plus S.D. \*\*\* $p < 0.001$ . **(F-H)** Flag-GLUL was reconstituted in GLUL-deficient KC cell line (clone #4) **(F)**. Cells were cultured under indicated conditions for 72 h. Relative growth **(G)** and cell death by propidium iodide (PI) staining **(H)** were measured by Celigo cell imager. Shown is the mean of a representative experiment performed in triplicate plus S.D. \*\*\*\* $p < 0.0001$ .

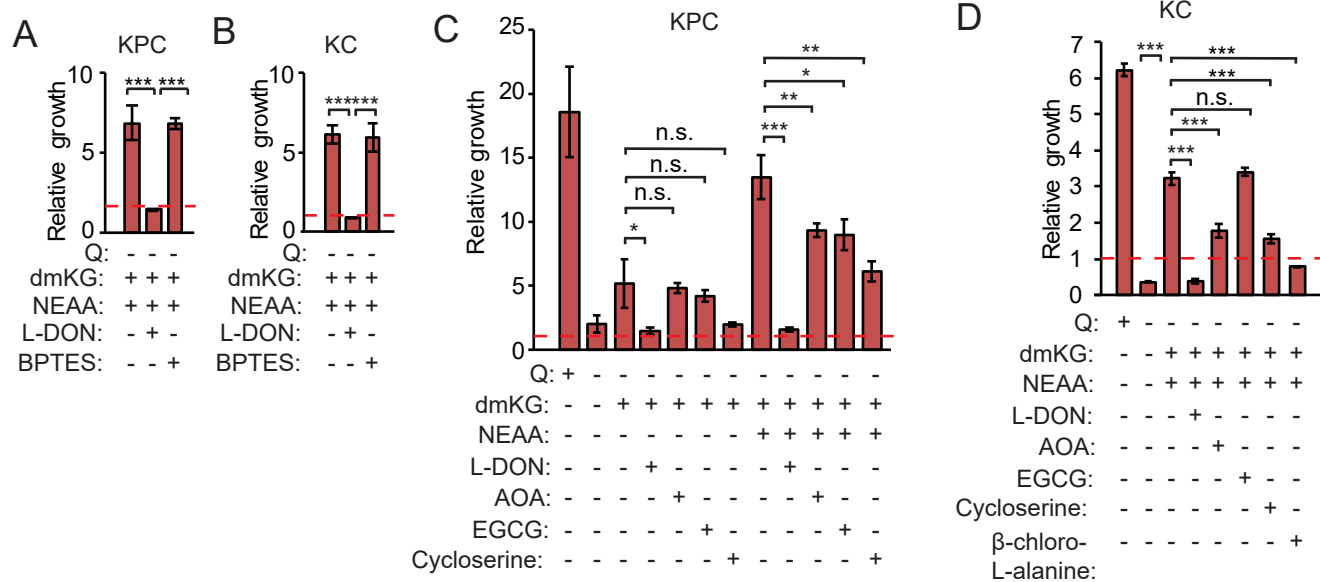

**Figure S2. Characterization of aKG rescue of glutamine-deprived cells, Related to Figure 2.**

KPC (**A, C**) and KC cells (**B, D**) were seeded at same density, then cultured under QKGN conditions in the presence of L-DON or BPTES (**A, B**) or transaminase inhibitors (**C, D**) for 72 h. Cell growth was determined by crystal violet staining. Shown are the mean of representative experiments performed in triplicates plus S.D. Red line indicates initial cell density at time of starting different culturing conditions. \* $p < 0.05$ ; \*\* $p < 0.01$ ; \*\*\* $p < 0.001$ ; \*\*\*\* $p < 0.0001$ .

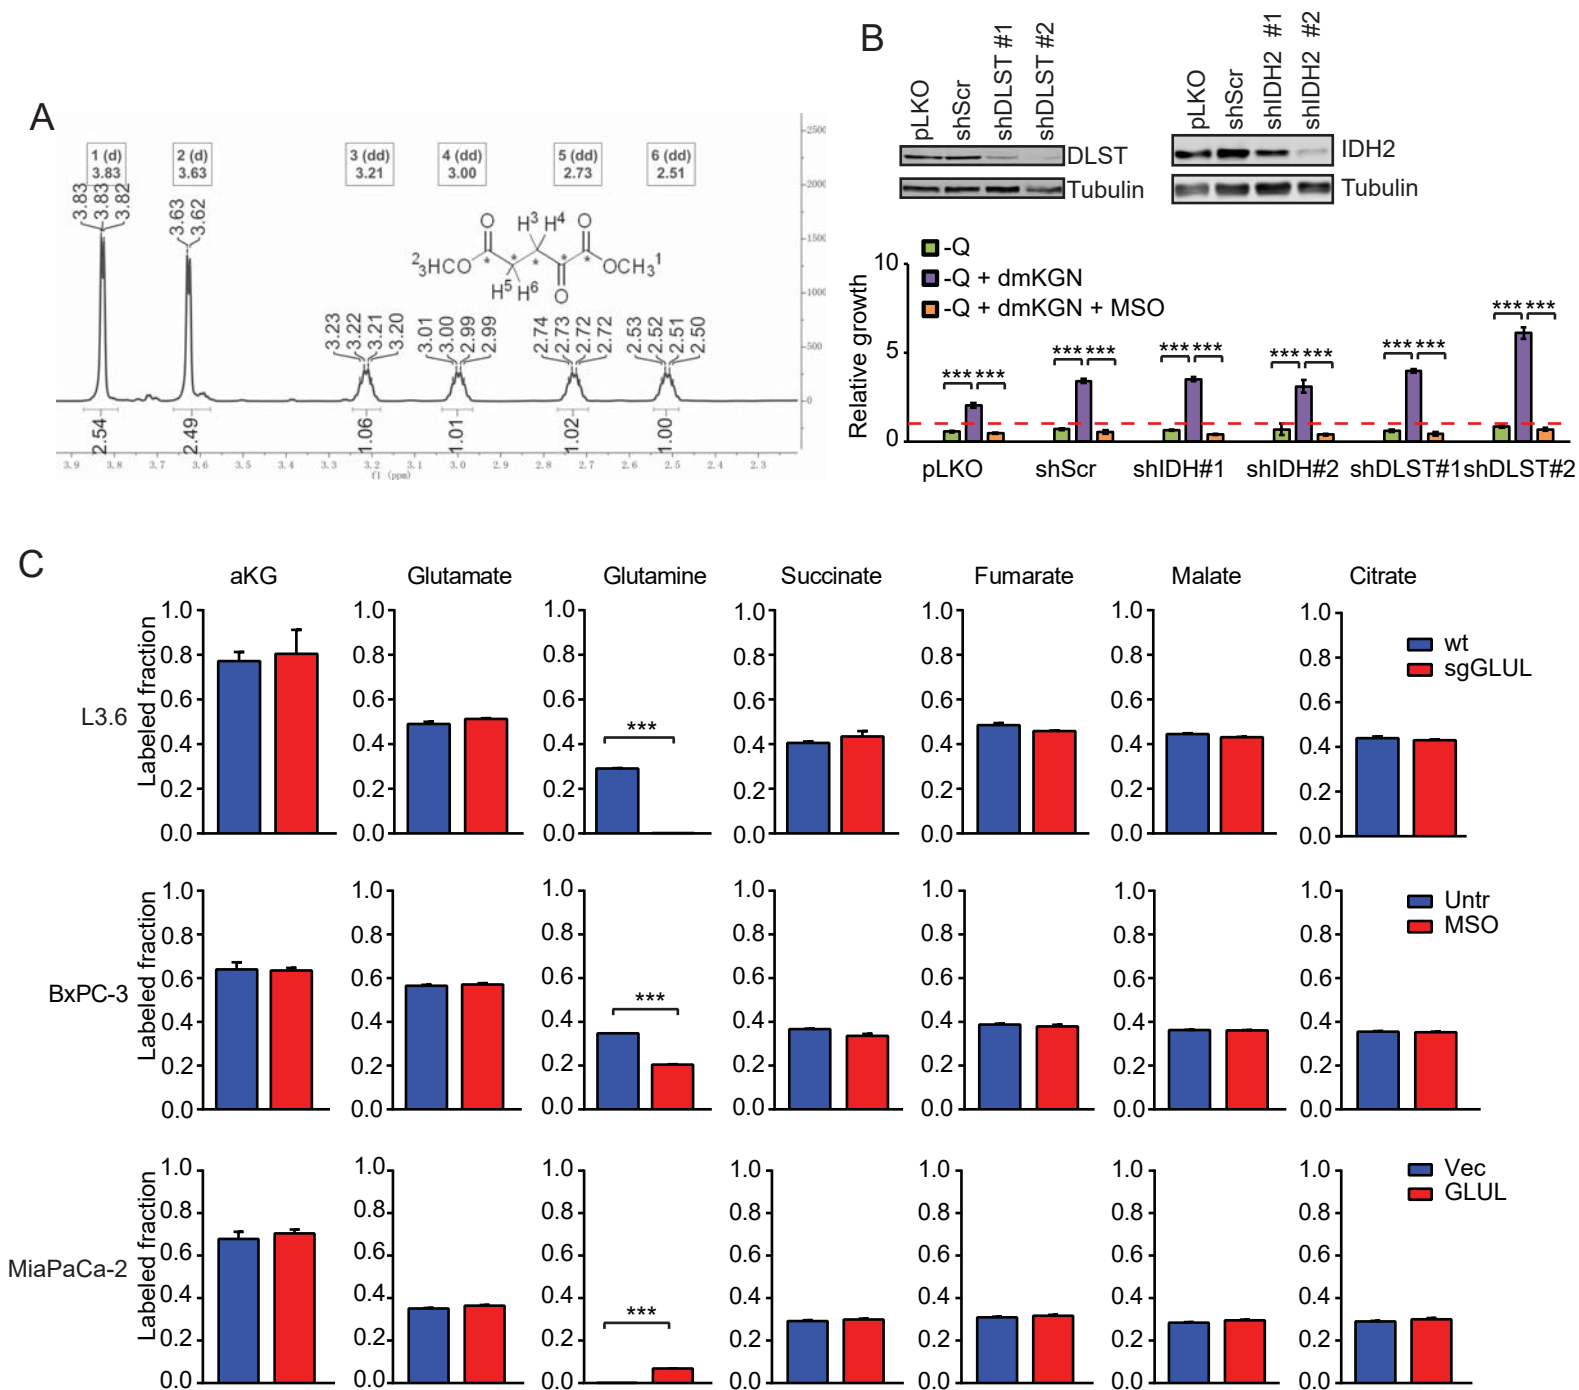

**Figure S3. GLUL expression does not affect the TCA cycle, Related to Figure 3.**

**(A)**  $^{13}\text{C}_5$ -dmKG was synthesized from  $^{13}\text{C}_5$ -aKG. The chemical shift ( $\delta$ ), coupling constant ( $J$ ), integration and splitting patterns of  $^{13}\text{C}_5$ -dmKG were characterized in  $^1\text{H}$ -NMR spectrum. Chemical shifts are expressed in parts per million (ppm) and reported as  $\delta$  value (chemical shift  $\delta$ ). Coupling constants are reported in units of hertz ( $J$  value, Hz; Integration and splitting patterns: where s = singlet, d = double, t = triplet, q = quartet, brs = broad singlet). The NMR result shows a complete conversion of  $^{13}\text{C}_5$ -aKG to  $^{13}\text{C}_5$ -dmKG. **(B)** KPC cells were stably transduced with 2 independent shRNAs targeting either IDH2 or DLST. Cells were cultured under indicated conditions for 72 h, and relative cell growth was determined by crystal violet staining. Shown are the mean of a triplicate experiment plus S.D. **(C)** L3.6 cells stably infected with sgGLUL, BxPC-3 cells treated with MSO, or MiaPaCa-2 cells stably expressing GLUL were seeded at equal density. After attachment, cells were washed three times with PBS, and cultured in glutamine-free media supplemented with 1.5 mM  $^{13}\text{C}_5$ -dmKG for 24 h. Polar metabolites were extracted and subjected to LC-MS. Total labeling of indicated metabolite is shown as means from a representative triplicate experiment plus S.D.

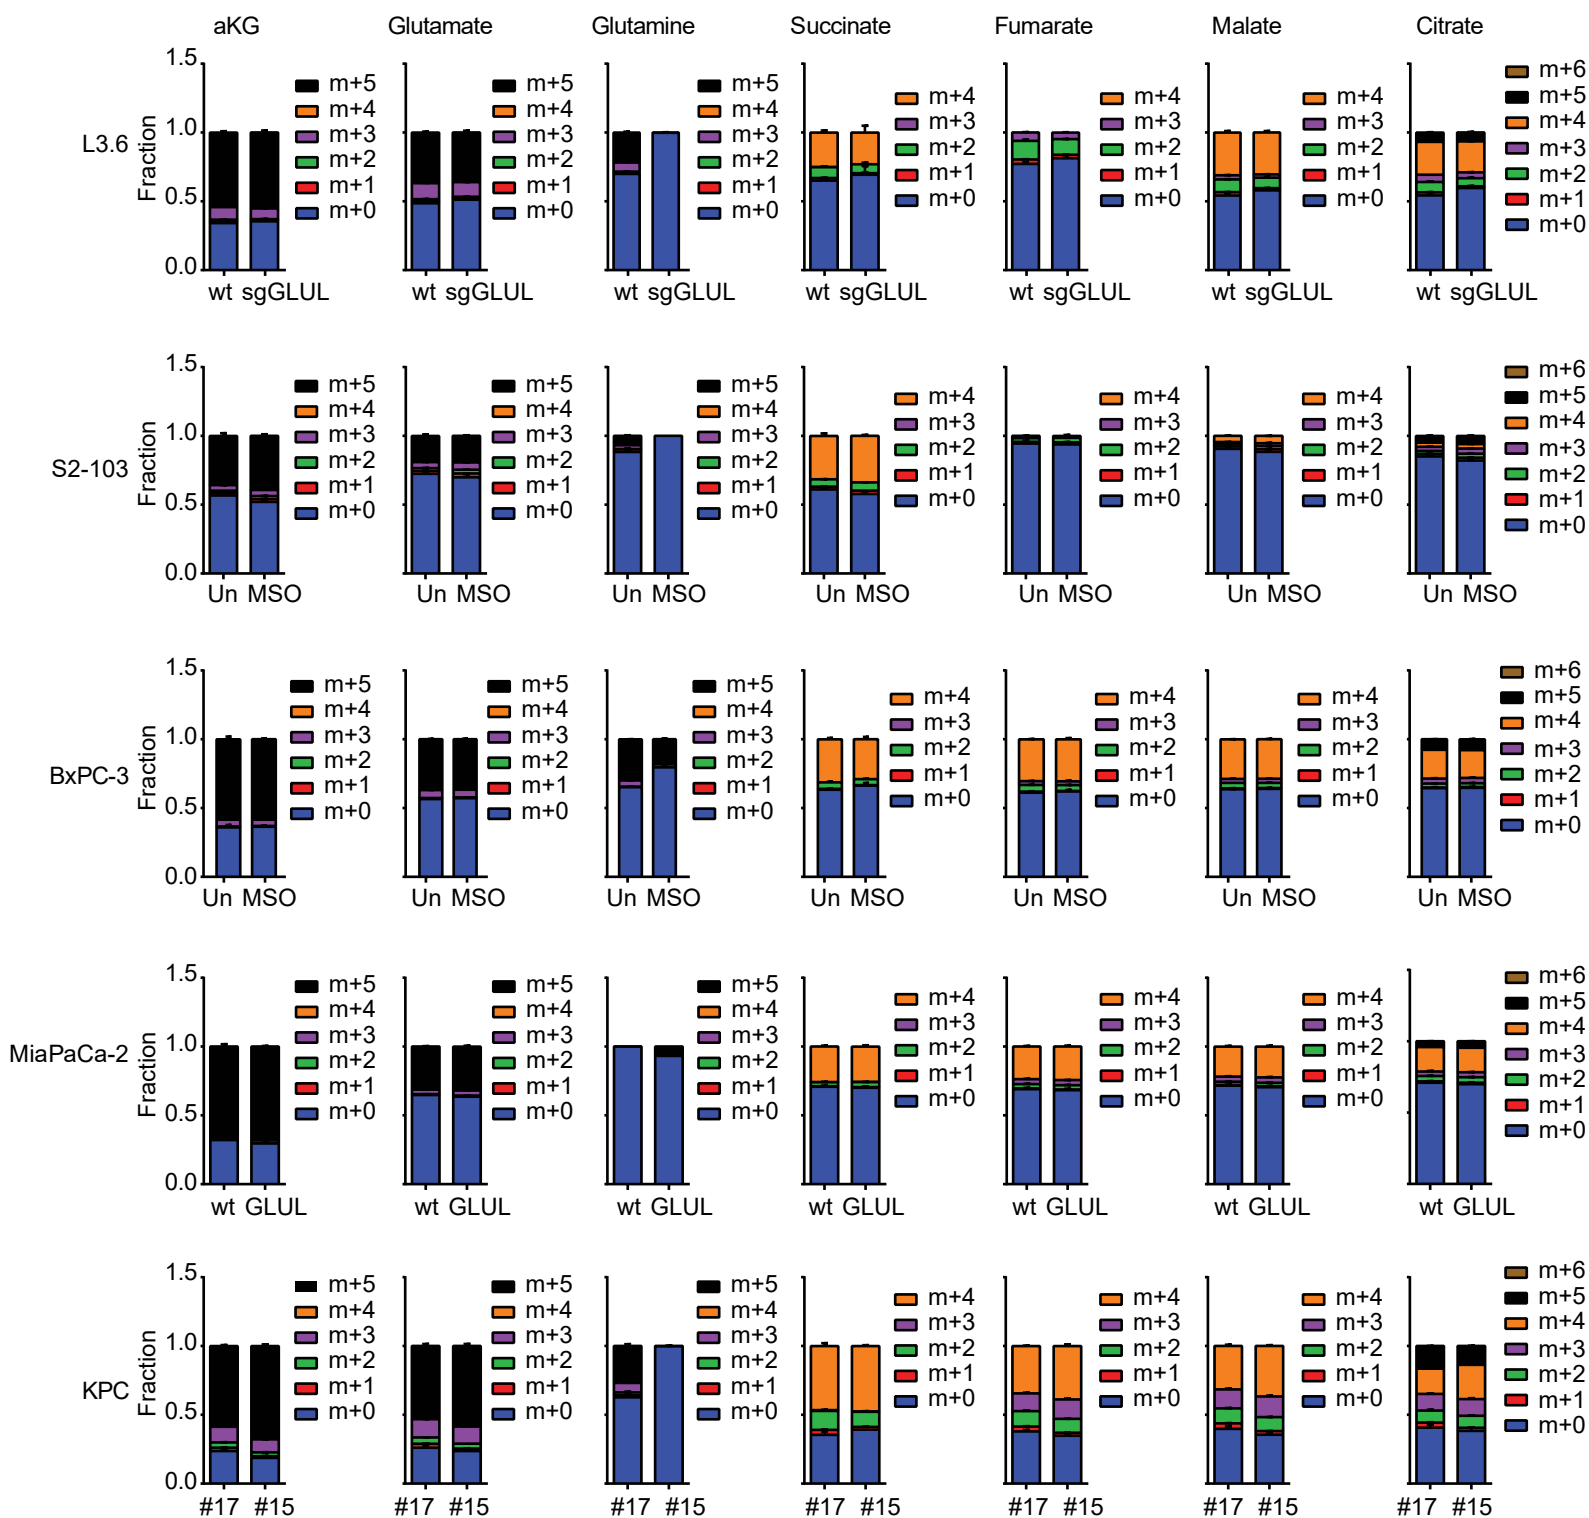

**Figure S4. Isotopologue distribution of  $^{13}\text{C}_5$ -dmKG labeled cells, Related to Figure 3.**

L3.6 (GLUL-proficient or deficient), S2-103 (untreated vs MSO-treated), BxPC-3 (untreated vs MSO-treated), MiaPaCa-2 (wt vs GLUL-overexpressing), and KPC (GLUL-proficient or deficient) were cultured in glutamine-free media supplemented with 1.5 mM  $^{13}\text{C}$ -dmKG for 24 h. Polar metabolites were extracted and subjected to LC-MS. Fractional labeling of indicated metabolite is shown, with each isotopologue shown. Shown are the means of a representative triplicate experiment plus S.D.

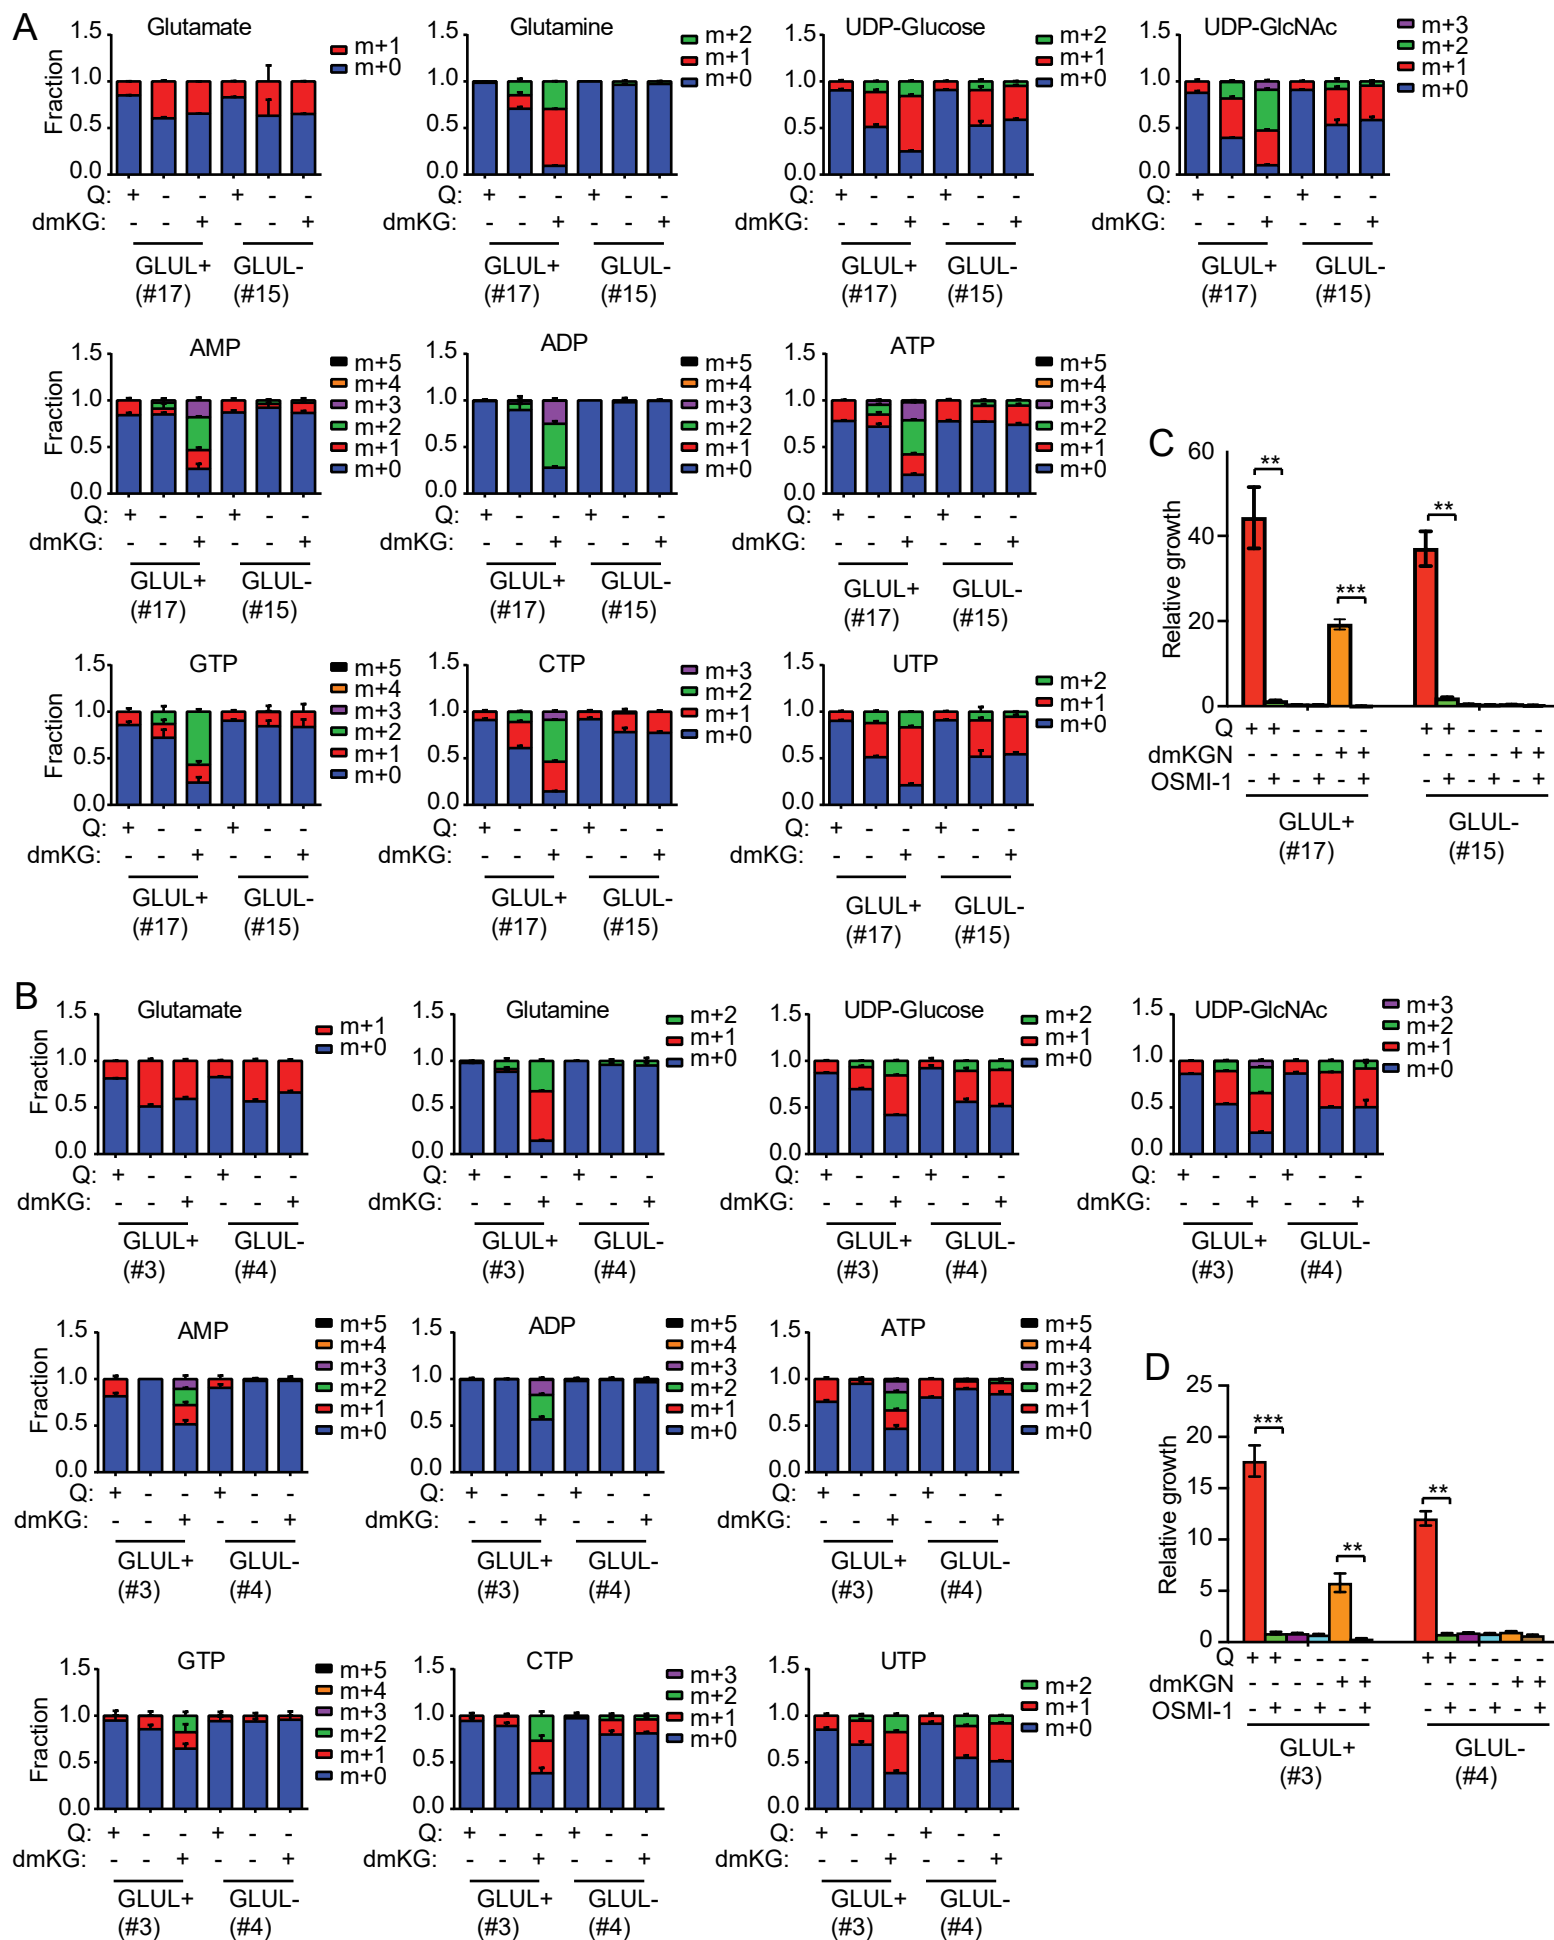

**Figure S5. GLUL-deficiency leads to defective nitrogen metabolism, Related to Figure 3.**

KPC **(A)** and KC **(B)** cells with stable sgGLUL expression were seeded at equal density. After attachment, cells were washed three times with PBS, and cultured in media supplemented with 1 mM  $^{15}\text{N-NH}_4\text{Cl}$  in the presence of 2 mM glutamine, glutamine-free, or glutamine-free supplemented with dmKG. Polar metabolites were extracted and subjected to LC-MS.

Fractional labeling of indicated metabolite is shown, with each isotopologue shown. Shown are the mean of a representative triplicate experiment plus S.D. KPC **(C)** and KC **(D)** cells were cultured under indicated conditions for 72 h. Relative growth was measured by the Celigo Cell Imager. Shown is the mean of a representative experiment performed in triplicate plus S.D.

\*\* $p < 0.01$ ; \*\*\* $p < 0.001$ . Note that OGT inhibitor OSMI-1 (50 mM) profoundly inhibited cell growth and dmKGN rescue in GLUL-proficient cells.

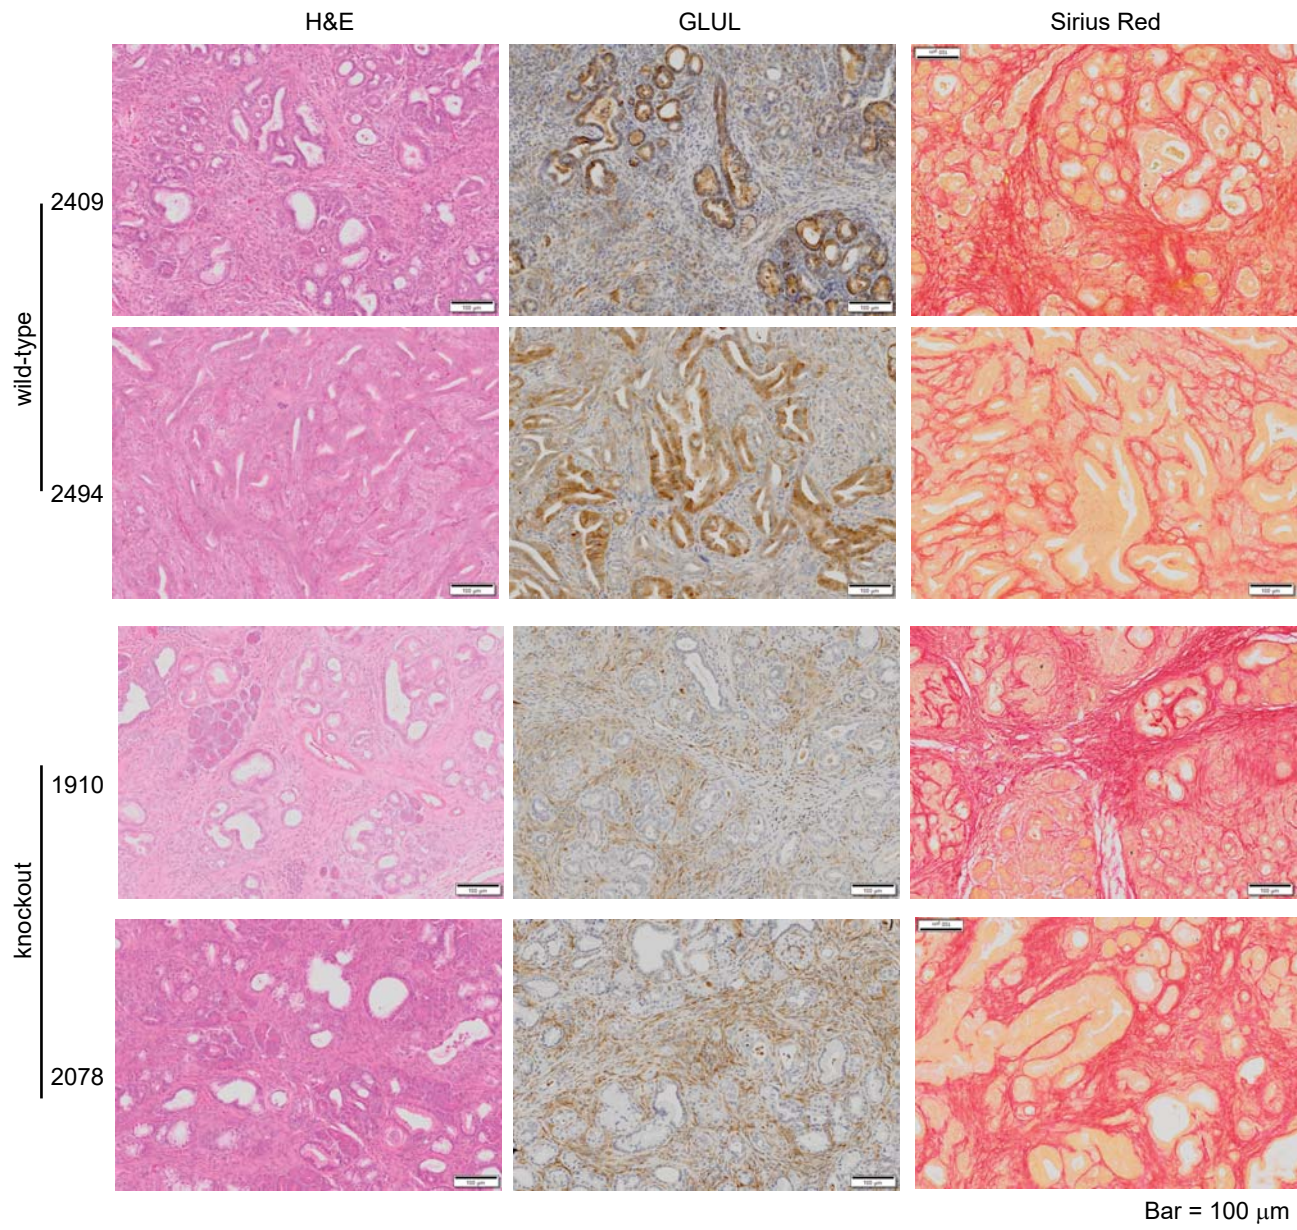

**Figure S6. GLUL expression is induced in stromal cells in GLUL<sup>ff</sup> mice, Related to Figure 4.**

Endpoint GLUL wild-type (WT) and knockout (KO) mice in the Kras<sup>G12D/+</sup>;p53<sup>ff/ff</sup>;Pdx1-Cre background were sacrificed. H&E, GLUL IHC, and Sirius Red (for fibrosis) staining were performed. Invasive pancreatic ductal carcinoma was developed in both WT and KO mice albeit with much latency in KO mice. Note in mice #1910 and #2078, while the ductal lesions were negative for GLUL expression, the stromal cells were strongly positive for GLUL and fibrosis.
